# Supplementary material
Source: PubMed Central journal article supplement (PMC6583880)
Supplement: jamasurg-153-809-s001.pdf [file jamasurg-153-809-s001.pdf]

## Supplementary Online Content

Sandini M, Patiño M, Ferrone CR, et al. Association between changes in body composition and neoadjuvant treatment for pancreatic cancer. *JAMA Surg*. Published online May 9, 2018. doi:10.1001/jamasurg.2018.0979

**eTable.** Changes in Body Compartments, Radiologic Response and Resection Rate According to the Neoadjuvant Regimen

**eFigure.** Likelihood of Resection According to the Presence of Sarcopenia

This supplementary material has been provided by the authors to give readers additional information about their work.

**eTable. Changes in Body Compartments, Radiologic Response and Resection Rate According to the Neoadjuvant Regimen**

|                              | FOLFIRINOX          | PAXG/PEXG          | GEM-based          | p value |
|------------------------------|---------------------|--------------------|--------------------|---------|
| delta TAT (cm <sup>2</sup> ) | -48.0 (-120.0-21.0) | -24.6 (-58.9-42.7) | -18.0 (-99.0-37.0) | 0.035   |
| delta VAT (cm <sup>2</sup> ) | -24.0 (-61.0-7.0)   | -4.6 (-24.8-14.7)  | -14.7 (-78.0-26.8) | 0.123   |
| delta SM (cm <sup>2</sup> )  | 6.80 (-3.9-19.0)    | -0.1 (-10.0-5.1)   | -5.9 (-3.5-19.6)   | 0.096   |
| Response to CT               |                     |                    |                    | 0.028   |
| Stable disease               | 77 (62.1)           | 34 (63.0)          | 12 (80.0)          |         |
| Partial response             | 24 (19.4)           | 19 (3.2)           | 2 (13.3)           |         |
| Progressive disease          | 20 (16.1)           | 1 (1.9)            | 1 (6.7)            |         |
| Complete response            | 3 (2.4)             | 0 (0.0)            | 0 (0.0)            |         |
| Resection                    | 91 (73.4)           | 33 (61.1)          | 12 (80.0)          | 0.180   |

TAT: total adipose tissue area; VAT: visceral adipose tissue area; SM: skeletal muscle area. PAXG/PEXG : cisplatin + epirubicin/nab-paclitaxel + capecitabine + gemcitabine; GEM: gemcitabine.

**eFigure. Likelihood of Resection According to the Presence of Sarcopenia**

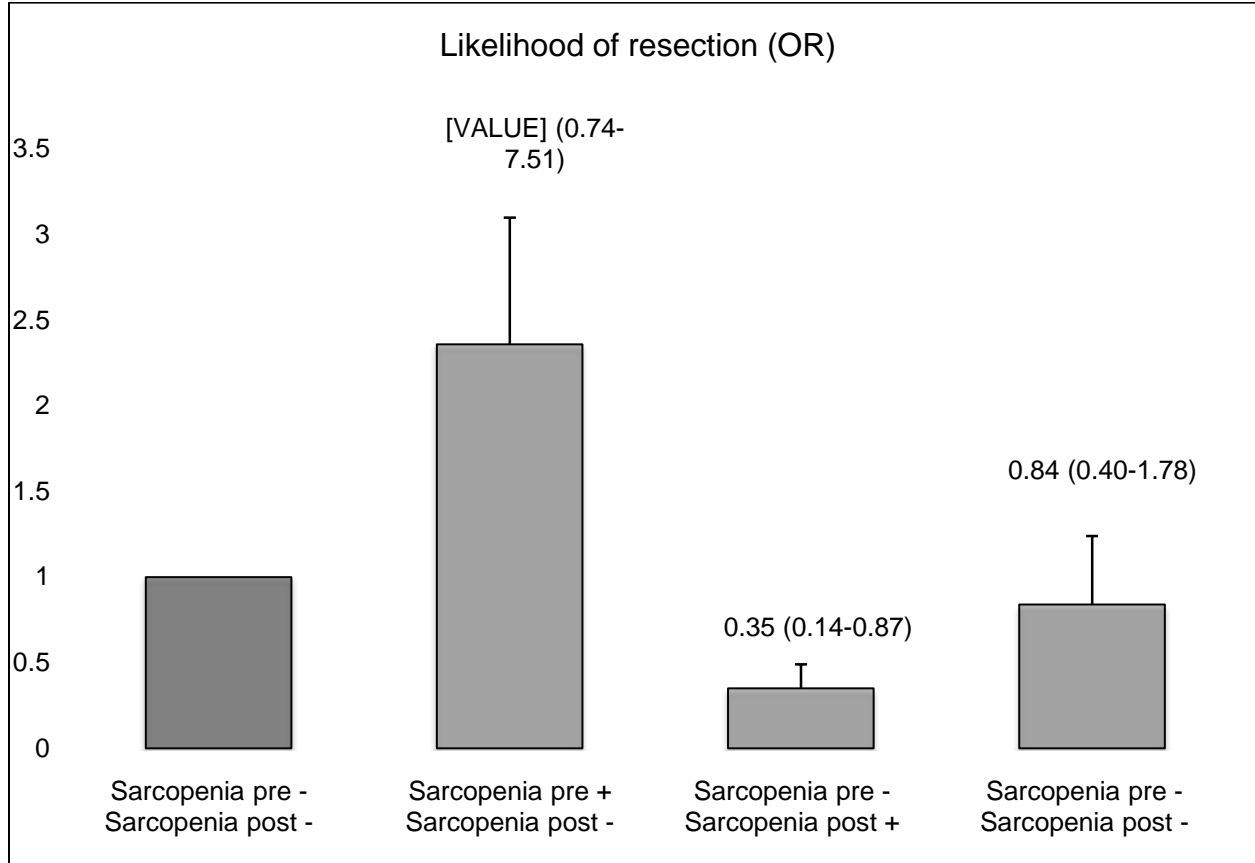

Non-sarcopenic patients at both pre-NT and post-NT CT-scans were considered as the reference group. Data are reported as ORs and 95%CI.
